# Supplementary material for: Self-assembled MoS2/rGO nanocomposites with tunable UV-IR absorption
Source: Royal Society of Chemistry journal article supplement (doi:10.1039/c7ra12455d), 2018-01-01
Supplement: c7ra12455d1.pdf [file c7ra12455d1.pdf]

# Self-assembled MoS<sub>2</sub>/rGO Nanocomposites with Tunable UV-IR Absorption

*Wei Wang,<sup>\*1,2</sup> Olesya O. Kapitanova,<sup>3</sup> Pugazhendi Ilanchezhian,<sup>2</sup> Sixing Xi,<sup>1</sup>*

*Gennady N. Panin,<sup>\*2,4</sup> Dejun Fu,<sup>5</sup> Tae Won Kang<sup>2</sup>*

*<sup>1</sup> College of Science, Hebei University of Engineering, Handan 056038, China .*

*<sup>2</sup> Department of Physics, Quantum-Functional Semiconductor Research Center, Nano Information Technology Academy, Dongguk University, 100-715, Seoul, Korea*

*<sup>3</sup> Department of Chemistry, Moscow State University, Leninskie Gory, 1, b.3, 119991, Moscow, Russia*

*<sup>4</sup>Institute for Microelectronics Technology & High Purity Materials, RAS, 142432 Chernogolovka, Moscow district, Russia*

*<sup>5</sup>Key Laboratory of Artificial Micro- and Nano-Materials of Ministry of Education and School of Physics and Technology, Wuhan University, Wuhan 430072, China.*

*\*E-mail: [g\\_panin@dongguk.edu](mailto:g_panin@dongguk.edu); [panin@iptm.ru](mailto:panin@iptm.ru) (G.N.P), [wangwe19872010@163.com](mailto:wangwe19872010@163.com) (W.W)*

Figure S1 shows the SEM images of MoS<sub>2</sub>/rGO composites on a SiO<sub>2</sub>/Si substrate after annealing for the different TAA/GO ratios: (a) 1:0, (b) 1:1, (c) 1:2 and (d) 1:3. rGO deriving from GO acts as a dispersing platform, efficiently reducing the aggregation of MoS<sub>2</sub> with a decrease of the TAA/GO ratio and forming self-assembled layered MoS<sub>2</sub>/rGO structures during the hydrothermal process. The morphology of the annealed structure is slightly different from the morphology of as-grown structure (Fig. 1).

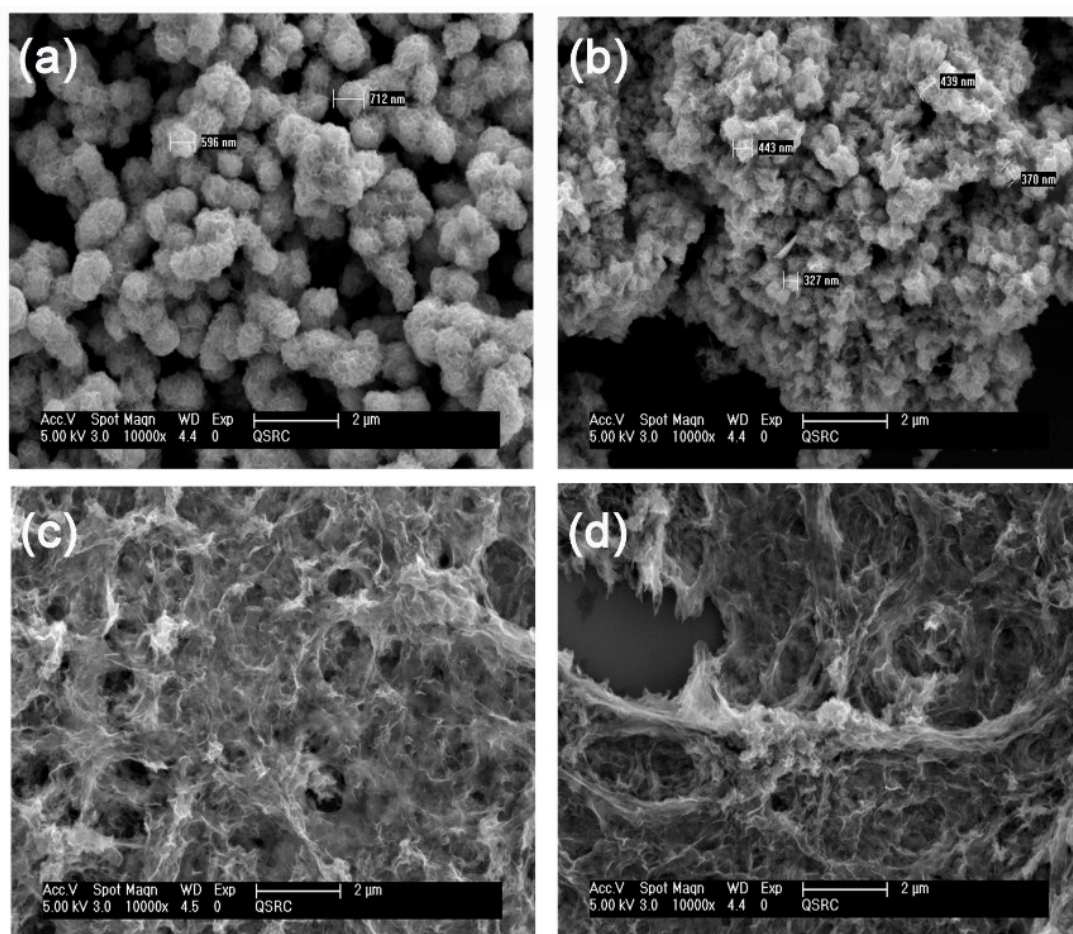

**Figure S1.** SEM images of MoS<sub>2</sub>/rGO composites on a SiO<sub>2</sub>/Si substrate after annealing for the different TAA/GO ratios: (a) 1:0, (b) 1:1, (c) 1:2 and (d) 1:3.

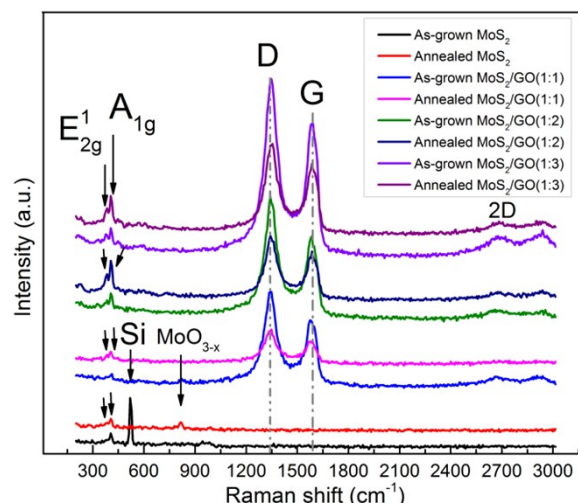

**Figure S2.** Raman spectra of MoS<sub>2</sub> and MoS<sub>2</sub>/rGO composites with different GO content before and after annealing (fitted with Lorentzian functions).

The Raman spectra of MoS<sub>2</sub> (Fig. S2) show the weak peak at 820 cm<sup>-1</sup> which corresponds to the M=O bending stretch vibrations for MoO<sub>3-x</sub> and can be ascribed to the formation of molybdenum oxide during annealing process [1-2]. This peak disappears in the spectra of MoS<sub>2</sub>/GO composites, indicating a stronger binding of oxygen to carbon. The origin of the main peaks of the MoS<sub>2</sub>/r-GO composite (E<sup>1</sup><sub>2g</sub>, A<sub>1g</sub> and G, D) is discussed in the description of Fig. 2b. The 520 cm<sup>-1</sup> peak and the peaks at ~2700 and ~2930 cm<sup>-1</sup> correspond to the Si substrate [3] and the second-order 2D and D+G bands of graphene [4-5], respectively.

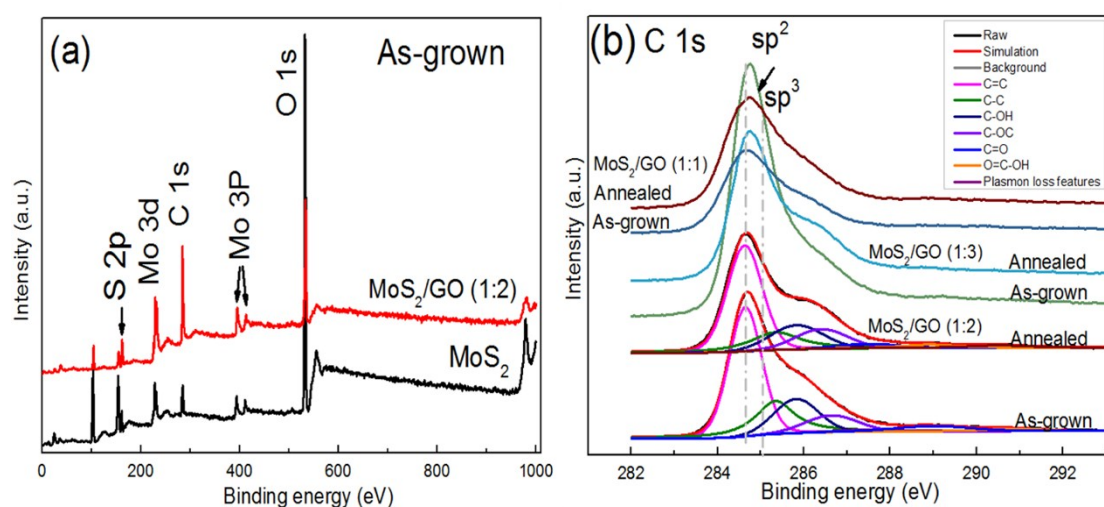

**Figure S3.** X-ray photoelectron spectra of MoS<sub>2</sub> and MoS<sub>2</sub>/rGO composites corresponding to (a) survey, and (b) C 1s core levels.

The chemical composition and binding energies of elements in MoS<sub>2</sub>/rGO composites were investigated using XPS. Figure S3 shows the X-ray photoelectron spectra of MoS<sub>2</sub> and MoS<sub>2</sub>/rGO composites corresponding to (a) survey, and (b) C 1s core levels. To fit the spectra of composites with MoS<sub>2</sub>/GO ratios 1:2 and 1:3, two doublets and splittings of 1.2 and 3.1 eV for S 2p and Mo 3d, respectively, were used. The stronger C 1s signal of the MoS<sub>2</sub>/GO (1:2) compared to MoS<sub>2</sub> (Fig. S3a) clearly indicates a significant hydrothermal GO reduction during the synthesis. The low intensity of the Mo 3d signals is apparently due to the formation of Mo<sub>2</sub>S<sub>x</sub>O<sub>1-x</sub> and Mo<sub>2</sub>S<sub>5</sub>, which shows an intermediate product in the MoS<sub>3</sub>-to-MoS<sub>2</sub> transition reacting with oxygen from GO deoxygenation. The spectra of C 1s can be decomposed into six components. Peaks at 284.6, 285.3, 285.8, 286.6, 287.5, 288.99 correspond to C=C (sp<sup>2</sup>) of 48.1 %, C-C (sp<sup>3</sup>) of 20.4 %, C-OH of 16.4 %, C-O-C of 9.5 %, C=O of 1.2 %, and O=C-OH of 4.4 %, respectively, further confirming the existence of rGO in the composites (Fig. S3b).

**Table S1.** Detailed characteristics of Raman scattering of MoS<sub>2</sub> and MoS<sub>2</sub>/rGO composites.

| Specimen                       |          | Peak position(cm <sup>-1</sup> ) |                 | FWHM (cm <sup>-1</sup> )     |                 | Peak position(cm <sup>-1</sup> ) |         |
|--------------------------------|----------|----------------------------------|-----------------|------------------------------|-----------------|----------------------------------|---------|
|                                |          | E <sup>1</sup> <sub>2g</sub>     | A <sub>1g</sub> | E <sup>1</sup> <sub>2g</sub> | A <sub>1g</sub> | D                                | G       |
| MoS <sub>2</sub>               | As-grown | 381.2                            | 407.6           | 35.1                         | 12.8            | /                                | /       |
|                                | Annealed | 381.2                            | 407.4           | 26.96                        | 12.7            | /                                | /       |
| MoS <sub>2</sub> /rGO<br>(1:1) | As-grown | 381.9                            | 406.6           | 30.6                         | 19.9            | 1342.3                           | 1576.4  |
|                                | Annealed | 382.1                            | 405.3           | 28.4                         | 17.6            | 1341.7                           | 1573.98 |
| MoS <sub>2</sub> /rGO<br>(1:2) | As-grown | 382.1                            | 404.6           | 22.0                         | 13.6            | 1345.9                           | 1578.6  |
|                                | Annealed | 382.6                            | 404.5           | 21.3                         | 15.7            | 1348.7                           | 1581.4  |
| MoS <sub>2</sub> /rGO<br>(1:3) | As-grown | 382.6                            | 404.4           | 17.9                         | 12.1            | 1347.6                           | 1581.7  |
|                                | Annealed | 382.7                            | 404.1           | 20.5                         | 15.2            | 1349.1                           | 1581.9  |

**Table S2.** Chemical composition and energy of chemical bonds of components.

| Specimen                    |          | Chemical Composition (At. %) |      | Mo 3d <sub>5/2</sub> (eV) |        |        | S 2p <sub>3/2</sub> (eV) |        |
|-----------------------------|----------|------------------------------|------|---------------------------|--------|--------|--------------------------|--------|
|                             |          | S                            | Mo   | S-Mo-S                    | S-Mo-O | O-Mo-O | S-Mo-S                   | S-Mo-O |
| MoS <sub>2</sub>            | As-grown | 59.8                         | 40.2 | 229.4                     | 229.7  | 233.4  | 161.4                    | 162.2  |
|                             | Annealed | 67.97                        | 32.1 | 229.5                     | 230.4  | 233.3  | 161.6                    | 162.3  |
| MoS <sub>2</sub> /rGO (1:1) | As-grown | 58.5                         | 41.5 | 229.2                     | 229.6  | 232.6  | 162.1                    | 162.2  |
|                             | Annealed | 60.3                         | 39.7 | 229.2                     | 229.7  | 232.9  | 162.0                    | 162.4  |
| MoS <sub>2</sub> /rGO (1:2) | As-grown | 59.8                         | 40.2 | 229.4                     | 230.6  | 232.8  | 162.2                    | 162.7  |
|                             | Annealed | 61.6                         | 38.4 | 229.3                     | 229.8  | 232.8  | 162.1                    | 162.5  |
| MoS <sub>2</sub> /rGO (1:3) | As-grown | 56.9                         | 43.1 | 229.5                     | 229.8  | 232.7  | 162.3                    | 162.6  |
|                             | Annealed | 64.7                         | 35.3 | 229.5                     | 231.6  | 233.2  | 162.2                    | 162.6  |

**Table S3.** Detailed C1s bonds for the MoS<sub>2</sub>/rGO (1:2) composite.

| Specimen |                        | As-grown MoS <sub>2</sub> /rGO (1:2) |      | Annealed MoS <sub>2</sub> /rGO (1:2) |      |
|----------|------------------------|--------------------------------------|------|--------------------------------------|------|
|          |                        | Energy (eV)                          | At.% | Energy (eV)                          | At.% |
| Bonding  | C=C (sp <sup>2</sup> ) | 284.6                                | 48.1 | 284.6                                | 48.8 |
|          | C-C (sp <sup>3</sup> ) | 285.3                                | 20.4 | 285.4                                | 15.9 |
|          | C-OH                   | 285.8                                | 16.4 | 285.8                                | 15.8 |
|          | C-O-C                  | 286.6                                | 9.5  | 286.4                                | 12.9 |
|          | C=O                    | 287.5                                | 1.2  | 287.5                                | 3.3  |
|          | O=C-OH                 | 289                                  | 4.4  | 288.9                                | 3.3  |
|          | Plasmon loss feature   | 290.9                                | /    | 290.5                                | /    |

The chemical reaction for the hydrothermal synthesis can be described as:

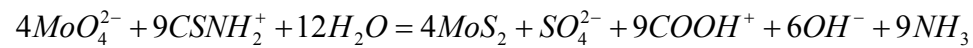

## References

[1] B. Yan, Z. Zheng, J.X. Zhang, H. Gong, Z.X. Shen, W. Huang, T.Yu, J. Phys.

Chem. C 113 (2009) 20259-20263.

- [2] M. Dieterle, G. Weinberg, G. Mestl, Phys. Chem. Chem. Phys. 4 (2002) 812-821.
- [3] M. Baleva, G. Zlateva, A. Atanassov, M. Abrashev, E. Goranova, Phys. Rev. B 72 (2005) 115330-115.
- [4] A.C. Ferrari, J.C. Meyer, V. Scardaci, C. Casiraghi, M. Lazzeri, F. Mauri, S. Piscanec, D. Jiang, K.S. Novoselov, S. Roth, A.K. Geim, Phys. Rev. Lett. 97 (2006) 187401-187404.
- [5] M.A. Pimenta, G. Dresselhaus, M.S. Dresselhaus, L.A. Cancado, A. Jorio, R. Sato, Phys. Chem. Chem. Phys. 9 (2007) 1276-1291.
